# Supplementary material
Source: HighWire-hosted journal article supplement (https://fn.bmj.com/content/103/6/F506)
Supplement: inline-supplementary-material-1 [file inline-supplementary-material-1.docx]

**Appendix 1: Literature search strategy(Embase, Pubmed, Cochrane library)**

**EMBASE.com**

**#1** 'corticosteroid'/exp OR '11 hydroxycorticosteroid'/exp OR '17 hydroxycorticosteroid'/exp OR 'corticosteroid derivative'/exp OR 'glucocorticoid'/exp OR '11beta,17beta dihydroxy 17 (1 propynyl)androsta 1,4,6 trien 3 one'/exp OR '11beta,17beta dihydroxy 6 methyl 17alpha (1 propynyl)androsta 1,4,6 trien 3 one'/exp OR '17alpha,21 dihydroxy 16alpha methylpregna 1,4,9(11) triene 3,20 dione'/exp OR '6alpha,9alpha difluoro 11beta,17alpha dihydroxy 16beta methyl 17beta methylthiocarbonylandrosta 1,4 dien 3 one 17 acetate'/exp OR '6alpha,9alpha difluoro 11beta,17alpha dihydroxy 16beta methyl 17beta methylthiocarbonylandrosta 1,4 dien 3 one 17 propionate'/exp OR 'alclometasone'/exp OR 'alclometasone dipropionate'/exp OR 'algestone'/exp OR 'algestone acetonide'/exp OR 'amcinonide'/exp OR 'amelometasone'/exp OR 'beclometasone dipropionate'/exp OR 'betamethasone'/exp OR 'betamethasone acetate'/exp OR 'betamethasone benzoate'/exp OR 'betamethasone dipropionate'/exp OR 'betamethasone valerate'/exp OR 'celestamine'/exp OR 'budesonide'/exp OR 'butixocort'/exp OR 'butixocort 21 propionate'/exp OR 'chloroprednisone'/exp OR 'ciclesonide'/exp OR 'ciprocinonide'/exp OR 'clobetasol'/exp OR 'clobetasol butyrate'/exp OR 'clobetasol propionate'/exp OR 'clobetasone'/exp OR 'clobetasone butyrate'/exp OR 'clocortolone'/exp OR 'clocortolone pivalate'/exp OR 'cloprednol'/exp OR 'cortisone'/exp OR 'cortisone acetate'/exp OR 'tetrahydrocortisone'/exp OR 'cortivazol'/exp OR 'deflazacort'/exp OR 'desoximetasone'/exp OR 'dexamethasone'/exp OR 'dexamethasone 17 valerate'/exp OR 'dexamethasone 17,21 dipropionate'/exp OR 'dexamethasone 21 mesilate'/exp OR 'dexamethasone acetate'/exp OR 'dexamethasone cipecilate'/exp OR 'dexamethasone isonicotinate'/exp OR 'dexatopic'/exp OR 'sofradex'/exp OR 'diflorasone'/exp OR 'diflorasone diacetate'/exp OR 'diflucortolone'/exp OR 'diflucortolone valerate'/exp OR 'difluprednate'/exp OR 'domoprednate'/exp OR 'drocinonide'/exp OR 'dutimelan'/exp OR 'etiprednol dicloacetate'/exp OR 'fluclorolone'/exp OR 'fluclorolone acetonide'/exp OR 'fludrocortisone'/exp OR 'fludrocortisone acetate'/exp OR 'fludroxycortide'/exp OR 'flumetasone'/exp OR 'flumetasone acetate'/exp OR 'flumetasone pivalate'/exp OR 'flumoxonide'/exp OR 'flunisolide'/exp OR 'flunisolide acetate'/exp OR 'fluocinolone'/exp OR 'fluocinolone acetonide'/exp OR 'fluocinonide'/exp OR 'fluocortin'/exp OR 'fluocortin butyl'/exp OR 'fluocortolone'/exp OR 'fluocortolone caproate'/exp OR 'fluocortolone pivalate'/exp OR 'fluorometholone'/exp OR 'fluorometholone acetate'/exp OR 'fluprednidene'/exp OR '

fluprednidene acetate'/exp OR 'fluprednisolone'/exp OR 'fluticasone'/exp OR 'fluticasone furoate'/exp OR 'fluticasone propionate'/exp OR 'formocortal'/exp OR 'halcinonide'/exp OR 'halometasone'/exp OR 'halopredone'/exp OR 'halopredone acetate'/exp OR '18 hydroxyhydrocortisone'/exp OR '18 oxohydrocortisone'/exp OR '6beta hydroxyhydrocortisone'/exp OR 'epihydrocortisone'/exp OR 'hydrallostane'/exp OR 'hydrocortamate'/exp OR 'hydrocortisone'/exp OR 'hydrocortisone aceponate'/exp OR 'hydrocortisone acetate'/exp OR 'hydrocortisone butyrate'/exp OR 'hydrocortisone cipionate'/exp OR 'hydrocortisone sodium phosphate'/exp OR 'hydrocortisone sodium succinate'/exp OR 'hydrocortisone tebutate'/exp OR 'hydrocortisone valerate'/exp OR 'tetrahydrocortisol'/exp OR 'icometasone enbutate'/exp OR 'isoflupredone'/exp OR 'isoflupredone acetate'/exp OR 'itrocinonide'/exp OR 'locicortolone dicibate'/exp OR 'lorinden a'/exp OR 'lorinden t'/exp OR 'loteprednol'/exp OR 'loteprednol etabonate'/exp OR 'mazipredone'/exp OR 'medrysone'/exp OR 'meprednisone'/exp OR 'mometasone furoate'/exp OR 'nicocortonide'/exp OR 'nivacortol'/exp OR 'oropivalone'/exp OR 'paramethasone'/exp OR 'paramethasone acetate'/exp OR 'prednisone'/exp OR 'prednisone acetate'/exp OR 'pregnenolone'/exp OR 'pregnenolone sulfate'/exp OR 'procinonide'/exp OR 'promestriene'/exp OR 'resocortol'/exp OR 'resocortol butyrate'/exp OR 'rimexolone'/exp OR 'rofleponide'/exp OR 'ticabesone'/exp OR 'ticabesone propionate'/exp OR 'timobesone'/exp OR 'timobesone acetate'/exp OR 'tipredane'/exp OR 'tixocortol'/exp OR 'tixocortol pivalate'/exp OR 'mycolog'/exp OR 'triamcinolone'/exp OR 'triamcinolone acetate'/exp OR 'triamcinolone acetonide'/exp OR 'triamcinolone diacetate'/exp OR 'triamcinolone hexacetonide'/exp OR 'ulobetasol propionate'/exp OR 'uniderm'/exp OR 'zoticasone'/exp OR 'hydroxyhydrocortisone'/exp OR 'mineralocorticoid'/exp OR 'fludrocortisone'/exp OR 'fludrocortisone acetate'/exp OR 'aldosterone'/exp'/exp OR 'tetrahydrodeoxycorticosterone'/exp OR 'corticosterone'/exp OR 'corticosterone 21 acetate'/exp OR 'dehydrocorticosterone'/exp OR 'deoxycorticosterone'/exp OR 'deoxycorticosterone acetat'/exp

**#2** glucocorticoid*:ab,ti OR glucocorticoidsteroid:ab,ti OR glucocorticosteroid:ab,ti OR glucocortoid:ab,ti OR glycocorticoid:ab,ti OR alclomethasone:ab,ti OR acloderm:ab,ti OR aclovate:ab,ti OR alcrovan:ab,ti OR alderm:ab,ti OR almeta:ab,ti OR delonal:ab,ti OR demiderm:ab,ti OR doremi:ab,ti OR legederm:ab,ti OR logoderm:ab,ti OR lomesone:ab,ti OR miloderme:ab,ti OR modraderm:ab,ti OR modrasone:ab,ti OR perderm:ab,ti OR vaderm:ab,ti OR alfasone:ab,ti OR alphasone:ab,ti OR didrogesterone:ab,ti OR algestone:ab,ti OR alfasol:ab,ti OR 'alfasone acetonide':ab,ti OR 'alphasone acetonide':ab,ti OR 'w 3395':ab,ti OR 'w3395':ab,ti OR amciderm:ab,ti OR amcinil:ab,ti OR amicla:ab,ti OR 'cl 34699':ab,ti OR 'cl34699':ab,ti OR cyclocort:ab,ti OR penticort:ab,ti OR visderm:ab,ti AND h:ab,ti OR 'ls 118460':ab,ti OR 'ls118460':ab,ti OR 'ts 410':ab,ti OR 'ts410':ab,ti OR amcinonide:ab,ti OR amelometasone:ab,ti OR beclomethasone:ab,ti OR aerobec:ab,ti OR afifon:ab,ti OR alanase:ab,ti OR aldecin:ab,ti OR aldecina:ab,ti OR aldecine:ab,ti OR anceron:ab,ti OR 'asmabec clickhaler':ab,ti OR atomase:ab,ti OR atomide:ab,ti OR beceze:ab,ti OR beclamet:ab,ti OR beclate:ab,ti OR beclazone:ab,ti OR becloasma:ab,ti OR 'beclocort nasel':ab,ti OR becloforte:ab,ti OR beclojet:ab,ti OR beclomet:ab,ti OR beclone:ab,ti OR beclorhinol:ab,ti OR beclosol:ab,ti OR beclotaide:ab,ti OR becloturmant:ab,ti OR becloturmat:ab,ti OR beclovent:ab,ti OR becodisk:ab,ti OR becodisks:ab,ti OR beconase:ab,ti OR beconasol:ab,ti OR becotide:ab,ti OR belax:ab,ti OR 'chf 1514':ab,ti OR 'chf1514':ab,ti OR clenil:ab,ti OR decomit:ab,ti OR ecobec:ab,ti OR filair:ab,ti OR miflasone:ab,ti OR nexxair:ab,ti OR nobec:ab,ti OR orbec:ab,ti OR propaderm:ab,ti OR rhinivict:ab,ti OR 'rhino clenil':ab,ti OR rinaze:ab,ti OR rynconox:ab,ti OR sanasthmax:ab,ti OR sanasthmyl:ab,ti OR 'sbn 024':ab,ti OR 'sbn024':ab,ti OR 'sch 18020w':ab,ti OR vancenase:ab,ti OR 'rg 833':ab,ti OR 'rg833':ab,ti OR rinderon:ab,ti OR 'sch 4831':ab,ti OR 'sch4831':ab,ti OR walacort:ab,ti OR cidoten:ab,ti OR dermobet:ab,ti OR diprolen:ab,ti OR flubenisolone:ab,ti OR methasone:ab,ti OR 'nsc39470':ab,ti OR betsolan:ab,ti OR betsolon:ab,ti OR betsopart:ab,ti OR celestan:ab,ti OR celestene:ab,ti OR celeston:ab,ti OR chronodose:ab,ti OR celestona:ab,ti OR celestone:ab,ti OR betacortril:ab,ti OR betadexamethasone:ab,ti OR betametasone:ab,ti OR betamethasolone:ab,ti OR betamethason:ab,ti OR dermitt:ab,ti OR euvaderm:ab,ti OR fluobate:ab,ti OR fluorobate:ab,ti OR flurobate:ab,ti OR 'ms 1112':ab,ti OR 'ms1112':ab,ti OR topicasone:ab,ti OR uticort:ab,ti OR 'sch 11460':ab,ti OR 'sch11460':ab,ti OR skizon:ab,ti OR topilene:ab,ti OR topisone:ab,ti OR alphatrex:ab,ti OR becloson:ab,ti OR beloderm:ab,ti OR bepronate:ab,ti OR beprosone:ab,ti OR betacrem:ab,ti OR betazone:ab,ti OR cleniderm:ab,ti OR cortiderm:ab,ti OR cremirit:ab,ti OR cycloson:ab,ti OR dicortin:ab,ti OR diprocel:ab,ti OR diproderm:ab,ti OR diprolene:ab,ti OR diprophos:ab,ti OR diprosalic:ab,ti OR diprosis:ab,ti OR 's 1320':ab,ti OR 's1320':ab,ti OR spirocort:ab,ti OR uceris:ab,ti OR 'map 0010':ab,ti OR 'map0010':ab,ti OR miflonide:ab,ti OR budesonide:ab,ti OR celestamine:ab,ti OR butixocort:ab,ti OR chlorprednisone:ab,ti OR ciclesonide:ab,ti OR 'rs 2386':ab,ti OR 'rs2386':ab,ti OR ciprocinonide:ab,ti OR clobetasol:ab,ti OR 'rs 4691':ab,ti OR 'rs4691':ab,ti OR syntestan:ab,ti OR clobetasone:ab,ti OR cloprednol:ab,ti OR 'nsc 80998':ab,ti OR 'nsc80998':ab,ti OR cortisone:ab,ti OR cortivazol:ab,ti OR dexamethasone:ab,ti OR 'r 2113':ab,ti OR 'r2113':ab,ti OR stiedex:ab,ti OR topcort:ab,ti OR topicort:ab,ti OR topicorte:ab,ti OR topiderm:ab,ti OR topisolon:ab,ti OR topisolone:ab,ti OR mexasone:ab,ti OR millicorten:ab,ti OR millicortenol:ab,ti OR 'mk 125':ab,ti OR 'mk125':ab,ti OR mymethasone:ab,ti OR neoforderx:ab,ti OR neofordex:ab,ti OR nisomethasona:ab,ti OR novocort:ab,ti OR 'nsc 34521':ab,ti OR 'nsc34521':ab,ti OR opticorten:ab,ti OR opticortinol:ab,ti OR oradexan:ab,ti OR oradexon:ab,ti OR oradexone:ab,ti OR orgadrone:ab,ti OR ozurdex:ab,ti OR pidexon:ab,ti OR policort:ab,ti OR posurdex:ab,ti OR sterasone:ab,ti OR desoximetasone:ab,ti OR dosauxison:ab,ti OR 'he 111':ab,ti OR 'he111':ab,ti OR thilodexine:ab,ti OR triamcimetil:ab,ti OR vexamet:ab,ti OR visumetazone:ab,ti OR visumethazone:ab,ti OR 'bay f 4797':ab,ti OR 'bay f4797':ab,ti OR diflorasone:ab,ti OR 'ro 12 7024':ab,ti OR 'ro 12-7024':ab,ti OR 'ro12 7024':ab,ti OR 'ro12-7024':ab,ti OR stermonid:ab,ti OR domoprednate:ab,ti OR 'sq 17409':ab,ti OR 'sq17409':ab,ti OR drocinonide:ab,ti OR dutimelan:ab,ti OR fluclorolone:ab,ti OR 'l 33379':ab,ti OR 'l33379':ab,ti OR fludroxycortide:ab,ti OR 'rs 2177':ab,ti OR 'rs2177':ab,ti OR flumetasone:ab,ti OR 'rs 40584':ab,ti OR 'rs40584':ab,ti OR flumoxonide:ab,ti OR nasalide:ab,ti OR nasarel:ab,ti OR rhinalar:ab,ti OR 'rs 3999':ab,ti OR 'rs3999':ab,ti OR sanergal:ab,ti OR synaclyn:ab,ti OR syntaris:ab,ti OR 'val 679':ab,ti OR 'val679':ab,ti OR flunisolide:ab,ti OR fluocinolone:ab,ti OR fluocinolon:ab,ti OR 'nsc 101791':ab,ti OR 'nsc101791':ab,ti OR rawracid:ab,ti OR ruful:ab,ti OR tohsino:ab,ti OR topsym:ab,ti OR topsymin:ab,ti OR topsyn:ab,ti OR topsyne:ab,ti OR vanos:ab,ti OR fluocinonide:ab,ti OR fluocortin:ab,ti OR fluocortolone:ab,ti OR fluorometholone:ab,ti OR fluprednidene:ab,ti OR fluoprednilidene:ab,ti OR fluorprednylidene:ab,ti OR fluprednilidene:ab,ti OR fluprednylidene:ab,ti OR alphadrol:ab,ti OR 'b 673':ab,ti OR 'b673':ab,ti OR lukrutor:ab,ti OR 'nsc 47439':ab,ti OR 'nsc47439':ab,ti OR fluprednisolone:ab,ti OR fluticasone:ab,ti OR formocortral:ab,ti OR formoftil:ab,ti OR halcinonide:ab,ti OR halometasone:ab,ti OR halopredone:ab,ti OR hydroxyhydrocortisone:ab,ti OR epihydrocortisone:ab,ti OR hydrallostane:ab,ti OR hydrocortamate:ab,ti OR 'nsc 10483':ab,ti OR 'nsc 741':ab,ti OR 'nsc10483':ab,ti OR nutracort:ab,ti OR tetrahydrocortisol:ab,ti OR tetrahydrohydrocortisone:ab,ti OR isoflupredone:ab,ti OR itrocinonide:ab,ti OR locicortone:ab,ti OR 'ru 24643':ab,ti OR 'ru24643':ab,ti OR loteprednol:ab,ti OR mazipredone:ab,ti OR medrisone:ab,ti OR medrixon:ab,ti OR medrocort:ab,ti OR 'nsc 63278':ab,ti OR 'nsc63278':ab,ti OR ophthocortin:ab,ti OR ophtocortin:ab,ti OR spectramedryn:ab,ti OR methylprednisone:ab,ti OR 'sch 4358':ab,ti OR 'sch4358':ab,ti OR meprednisone:ab,ti OR nicocortonide:ab,ti OR nivazol:ab,ti OR 'win 27914':ab,ti OR 'win27914':ab,ti OR nivacortol:ab,ti OR oropivalone:ab,ti OR paramesone:ab,ti OR parametazon:ab,ti OR paramethason:ab,ti OR paramethazone:ab,ti OR paramezone:ab,ti OR rectodelt:ab,ti OR servisone:ab,ti OR steerometz:ab,ti OR sterapred:ab,ti OR pregnenalone:ab,ti OR prenolon:ab,ti OR regnosone:ab,ti OR skinostelon:ab,ti OR 'rs 2362':ab,ti OR 'rs2362':ab,ti OR procinonide:ab,ti OR promestriene:ab,ti OR zoticasone:ab,ti OR uniderm:ab,ti OR 'bmy 30056':ab,ti OR 'bmy30056':ab,ti OR 'gp 14458':ab,ti OR 'cgp14458':ab,ti OR 'cl 19823':ab,ti OR 'cl19823':ab,ti OR korticoid:ab,ti OR ledercort:ab,ti OR omcilon:ab,ti OR polcortolon:ab,ti OR 'rp 8357':ab,ti OR 'rp8357':ab,ti OR simacort:ab,ti OR sterocort:ab,ti OR triamcinolone:ab,ti OR tixocortol:ab,ti OR timobesone:ab,ti OR ticabesone:ab,ti OR rofleponide:ab,ti OR rimexolone:ab,ti OR resocortol:ab,ti OR mineralocorticoid:ab,ti OR fluorinef:ab,ti OR fluorocortisone:ab,ti OR fluorohydrocortisone:ab,ti OR flurinef:ab,ti OR flurohydrocortisone:ab,ti OR fludrocortisone:ab,ti OR aldosterone:ab,ti OR 'nsc 9705':ab,ti OR 'nsc9705':ab,ti OR tetrahydrodeoxycorticosterone:ab,ti OR corticosterone:ab,ti OR dehydrocorticosterone:ab,ti OR deoxycorticosterone:ab,ti OR 'adrenal cortex hormone':ab,ti OR 'adrenal cortex hormones':ab,ti OR 'adrenal cortical hormone':ab,ti OR 'adrenal cortical hormones':ab,ti OR 'adrenal cortical steroid':ab,ti OR 'adrenal steroid':ab,ti OR 'adrenal steroid hormone':ab,ti OR 'adreno cortical steroid':ab,ti OR 'adreno corticosteroid':ab,ti OR 'adrenocortical hormone':ab,ti OR 'adrenocortical steroid':ab,ti OR adrenocorticosteroid:ab,ti OR 'cortical steroid':ab,ti OR 'cortico steroid':ab,ti OR 'corticosteroid hormone':ab,ti OR corticosteroids:ab,ti OR corticosteroid:ab,ti

**#3 #1 OR #2**

**#4** 'lung dysplasia'/exp OR 'chronic lung disease'/exp OR 'chronic bronchitis'/exp OR 'lung emphysema'/exp

**#5** 'lung dysplasia':ab,ti OR 'chronic lung disease':ab,ti OR 'chronic bronchitis':ab,ti OR 'lung emphysema':ab,ti OR 'bronchopulmonary dysplasia':ab,ti OR 'chronic lung diseases':ab,ti OR 'chronic pulmonary diseases':ab,ti OR 'pulmonary emphysema':ab,ti OR 'chronic pneumopathy':ab,ti OR 'chronic pulmonary disease':ab,ti

**#6 #4 OR #5**

**#7** 'newborn'/exp OR 'low birth weight'/exp OR 'extremely low birth weight'/exp OR 'small for date infant'/exp OR 'very low birth weight'/exp

**#8** newborn*:ab,ti OR neonate*:ab,ti OR neonatal:ab,ti OR premature:ab,ti OR 'extremely low birth weight':ab,ti OR 'small for date infant':ab,ti OR 'low birthweight':ab,ti OR 'newly born baby':ab,ti OR 'newly born child':ab,ti OR 'newly born infant':ab,ti OR 'small for gestational age':ab,ti OR 'low birth weight':ab,ti OR 'very low birth weight':ab,ti OR vlbw:ab,ti OR lbw:ab,ti

**#9 #7 OR #8**

**#10** 'multicenter study (topic)'/exp OR 'phase 2 clinical trial (topic)'/exp OR 'phase 3 clinical trial (topic)'/exp OR 'phase 4 clinical trial (topic)'/exp OR 'controlled clinical trial (topic)'/exp OR 'randomized controlled trial (topic)'/exp OR 'single blind procedure'/exp OR 'double blind procedure'/exp

#11 random*:ab,ti OR blind*:ab,ti OR singleblind*:ab,ti OR doubleblind*:ab,ti OR trebleblind*:ab,ti OR tripleblind*:ab,ti

**#12 #10 OR #11**

**#13 #3 AND #6 AND #9 AND #12**

**PubMed**

**#1** "Adrenal Cortex Hormones"[Mesh] OR "17-Ketosteroids"[Mesh] OR "Androstenedione"[Mesh] OR "Androsterone"[Mesh] OR "Dehydroepiandrosterone"[Mesh] OR "Dehydroepiandrosterone Sulfate"[Mesh] OR "Estrone"[Mesh] OR "Etiocholanolone"[Mesh] OR "Hydroxycorticosteroids"[Mesh] OR "11-Hydroxycorticosteroids"[Mesh] OR "18-Hydroxycorticosterone"[Mesh] OR "Aldosterone"[Mesh] OR "Corticosterone"[Mesh] OR "Hydrocortisone"[Mesh] OR "Tetrahydrocortisol"[Mesh] OR "17-Hydroxycorticosteroids"[Mesh] OR "Cortisone"[Mesh] OR "Cortodoxone"[Mesh] OR "Hydrocortisone"[Mesh] OR "Tetrahydrocortisol"[Mesh] OR "Tetrahydrocortisone"[Mesh] OR Desoxycorticosterone"[Mesh] OR "18-Hydroxydesoxycorticosterone"[Mesh] OR "Desoxycorticosterone Acetate"[Mesh] OR "Pregnenolone"[Mesh] OR "17-alpha-Hydroxypregnenolone"[Mesh] OR "Pregnenolone Carbonitrile"[Mesh]

**#2** Adrenocortical Hormone*[Title/Abstract] OR Adrenal Cortex Hormone*[Title/Abstract] OR Ketosteroid*[Title/Abstract] OR Androstenedione[Title/Abstract] OR Androsterone[Title/Abstract] OR Dehydroepiandrosterone[Title/Abstract] OR Estrone[Title/Abstract] OR Etiocholanolone[Title/Abstract] OR Glucocorticoid*[Title/Abstract] OR Hydroxycorticosteroid*[Title/Abstract] OR Aldosterone[Title/Abstract] OR Corticosterone[Title/Abstract] OR Hydrocortisone[Title/Abstract] OR Tetrahydrocortisol[Title/Abstract] OR Cortisone[Title/Abstract] OR Cortodoxone[Title/Abstract] OR Hydrocortisone[Title/Abstract] OR Tetrahydrocortisol[Title/Abstract] OR Tetrahydrocortisone[Title/Abstract] OR Pregnenolone[Title/Abstract] OR Hydroxypregnenolone[Title/Abstract]

**#3** "Glucocorticoids"[Mesh] OR "alclometasone dipropionate" [Supplementary Concept] OR "amcinonide” [Supplementary Concept] OR "Beclomethasone”[Mesh] OR "Betamethasone”[Mesh] OR "betamethasone acetate” [Supplementary Concept] OR "betamethasone benzoate” [Supplementary Concept] OR "betamethasone dipropionate, betamethasone sodium phosphate drug combination” [Supplementary Concept] OR "betamethasone sodium phosphate” [Supplementary Concept] OR "Betamethasone Valerate”[Mesh] OR "Budesonide”[Mesh] OR "ciclesonide” [Supplementary Concept] OR "Clobetasol”[Mesh] OR "clobetasone butyrate” [Supplementary Concept OR "clocortolone” [Supplementary Concept] OR "clocortolone pivalate” [Supplementary Concept] OR "Desoximetasone”[Mesh] OR "Dexamethasone”[Mesh] OR "dexamethasone 21-phosphate” [Supplementary Concept] OR "Dexamethasone Isonicotinate”[Mesh] OR "dichlorisone acetate” [Supplementary Concept] OR "diflorasone” [Supplementary Concept] OR "Diflucortolone”[Mesh] OR "difluprednate” [Supplementary Concept] OR "drocinonide phosphate potassium” [Supplementary Concept] OR "Flumethasone”[Mesh] OR "flumethasone pivalate” [Supplementary Concept] OR "Fluocinolone Acetonide”[Mesh] OR "Fluocinonide”[Mesh] OR "fluocortin butyl ester” [Supplementary Concept] OR "Fluocortolone”[Mesh] OR "Fluorometholone”[Mesh] OR "fluperolone acetate” [Supplementary Concept] OR "fluprednidene acetate” [Supplementary Concept] OR "Fluprednisolone”[Mesh] OR "Flurandrenolone”[Mesh] OR "Fluticasone Propionate, Salmeterol Xinafoate Drug Combination”[Mesh] OR "medrysone” [Supplementary Concept] OR "Melengestrol Acetate”[Mesh] OR "Methylprednisolone”[Mesh] OR "Methylprednisolone Hemisuccinate”[Mesh] OR "Paramethasone”[Mesh] OR "prednicarbate” [Supplementary Concept] OR "Prednisolone”[Mesh] OR "prednisolone hemisuccinate” [Supplementary Concept] OR "prednisolone phosphate” [Supplementary Concept] OR "Prednisone”[Mesh] OR "rimexolone” [Supplementary Concept] OR "terofenamate” [Supplementary Concept] OR "Triamcinolone”[Mesh] OR "Triamcinolone Acetonide”[Mesh] OR "triamcinolone benetonide” [Supplementary Concept]

**#4** Glucocorticoid*[Title/Abstract] OR alclometasone dipropionate[Title/Abstract] OR amcinonide[Title/Abstract] OR Beclomethasone[Title/Abstract] OR Betamethasone[Title/Abstract] OR Budesonide[Title/Abstract] OR ciclesonide[Title/Abstract] OR Clobetasol[Title/Abstract] OR clocortolone[Title/Abstract] OR Desoximetasone[Title/Abstract] OR Dexamethasone[Title/Abstract] OR diflorasone[Title/Abstract] OR Diflucortolone[Title/Abstract] OR difluprednate[Title/Abstract] OR Flumethasone[Title/Abstract] OR Fluocinonide[Title/Abstract] OR fluocortin butyl ester[Title/Abstract] OR Fluocortolone[Title/Abstract] OR Fluorometholone[Title/Abstract] OR fluperolone acetate[Title/Abstract] OR fluprednidene acetate[Title/Abstract] OR Fluprednisolone[Title/Abstract] OR Flurandrenolone[Title/Abstract] OR Fluticasone [Title/Abstract] OR medrysone[Title/Abstract] OR Melengestrol Acetate[Title/Abstract] OR Methylprednisolone[Title/Abstract] OR Paramethasone[Title/Abstract] OR prednicarbate[Title/Abstract] OR Prednisone[Title/Abstract] OR rimexolone[Title/Abstract] OR terofenamate[Title/Abstract] OR Triamcinolone[Title/Abstract]

**#5** "Mineralocorticoids"[Mesh] OR "Desoxycorticosterone"[Mesh] OR "Desoxycorticosterone Acetate"[Mesh]

**#6** Mineralocorticoid*[Title/Abstract] OR Desoxycorticosterone[Title/Abstract]

**#7 #1 OR #2 OR #3 OR #4 OR #5 OR #6**

**#8** "Bronchopulmonary Dysplasia"[Mesh] OR "Pulmonary Disease, Chronic Obstructive"[Mesh] OR "Bronchitis, Chronic"[Mesh] OR "Pulmonary Emphysema"[Mesh]

**#9** bronchopulmonary dysplasia[Title/Abstract] OR chronic lung disease*[Title/Abstract] OR chronic pulmonary disease*[Title/Abstract] OR Pulmonary Emphysema[Title/Abstract] OR Chronic Bronchitis[Title/Abstract]

**#10 #8 OR #9**

**#11** "Infant, Newborn"[Mesh] OR "Infant, Low Birth Weight"[Mesh] OR "Infant, Small for Gestational Age"[Mesh] OR "Infant, Very Low Birth Weight"[Mesh] OR "Infant, Postmature"[Mesh] OR "Infant, Premature"[Mesh] OR "Infant, Extremely Premature"[Mesh] OR

"Infant, Extremely Low Birth Weight"[Mesh]

**#12** newborn*[Title/Abstract] OR neonate*[Title/Abstract] OR neonatal[Title/Abstract] OR premature[Title/Abstract] OR Small for Gestational Age[Title/Abstract] OR low birth weight[Title/Abstract] OR very low birth weight[Title/Abstract] OR VLBW[Title/Abstract] OR LBW[Title/Abstract]

**#13 #11 OR #12**

**#14** "Clinical Trials, Phase II as Topic"[Mesh] OR "Clinical Trials, Phase III as Topic"[Mesh] OR "Clinical Trials, Phase IV as Topic"[Mesh] OR "Controlled Clinical Trials as Topic"[Mesh] OR "

Randomized Controlled Trials as Topic"[Mesh] OR "Intention to Treat Analysis"[Mesh] OR "Pragmatic Clinical Trials as Topic"[Mesh] OR "Clinical Trials, Phase II"[Publication Type] OR "Clinical Trials, Phase III"[Publication Type] OR "Clinical Trials, Phase IV"[Publication Type] OR "Controlled Clinical Trials"[Publication Type] OR "Randomized Controlled Trials"[Publication Type] OR "Pragmatic Clinical Trials as Topic"[Publication Type] OR "Single-Blind Method"[Mesh] OR "Double-Blind Method"[Mesh]

**#15** random*[Title/Abstract] OR blind*[Title/Abstract] OR singleblind*[Title/Abstract] OR doubleblind*[Title/Abstract] OR trebleblind*[Title/Abstract] OR tripleblind*[Title/Abstract]

**#16 #14 OR #15**

**#17 #7 AND #10 AND #13 AND #15**

**Cochrane Library**

**#1** MeSH descriptor: [Adrenal Cortex Hormones] explode all trees OR MeSH descriptor: [17-Ketosteroids] explode all trees OR MeSH descriptor: [Androstenedione] explode all trees OR MeSH descriptor: [Androsterone] explode all trees OR MeSH descriptor: [Dehydroepiandrosterone] explode all trees OR MeSH descriptor: [Dehydroepiandrosterone Sulfate] explode all trees OR MeSH descriptor: [Estrone] explode all trees OR MeSH descriptor: [Etiocholanolone] explode all trees OR MeSH descriptor: [Hydroxycorticosteroids] explode all trees OR MeSH descriptor: [11-Hydroxycorticosteroids] explode all trees OR MeSH descriptor: [18-Hydroxycorticosterone] explode all trees OR MeSH descriptor: [Aldosterone] explode all trees OR MeSH descriptor: [Corticosterone] explode all trees OR MeSH descriptor: [Hydrocortisone] explode all trees OR MeSH descriptor: [Tetrahydrocortisol] explode all trees OR MeSH descriptor: [17-Hydroxycorticosteroids] explode all trees OR MeSH descriptor: [Cortisone] explode all trees OR MeSH descriptor: [Cortodoxone] explode all trees OR MeSH descriptor: [Hydrocortisone] explode all trees OR MeSH descriptor: [Tetrahydrocortisol] explode all trees OR MeSH descriptor: [Tetrahydrocortisone] explode all trees OR Desoxycorticosterone] explode all trees OR MeSH descriptor: [18-Hydroxydesoxycorticosterone] explode all trees OR MeSH descriptor: [Desoxycorticosterone Acetate] explode all trees OR MeSH descriptor: [Pregnenolone] explode all trees OR MeSH descriptor: [17-alpha-Hydroxypregnenolone] explode all trees OR MeSH descriptor: [Pregnenolone Carbonitrile] explode all trees

**#2** Adrenocortical Hormone*:ti,ab,kw OR Adrenal Cortex Hormone*:ti,ab,kw OR Ketosteroid*:ti,ab,kw OR Androstenedione:ti,ab,kw OR Androsterone:ti,ab,kw OR Dehydroepiandrosterone:ti,ab,kw OR Estrone:ti,ab,kw OR Etiocholanolone:ti,ab,kw OR Glucocorticoid*:ti,ab,kw OR Hydroxycorticosteroid*:ti,ab,kw OR Aldosterone:ti,ab,kw OR Corticosterone:ti,ab,kw OR Hydrocortisone:ti,ab,kw OR Tetrahydrocortisol:ti,ab,kw OR Cortisone:ti,ab,kw OR Cortodoxone:ti,ab,kw OR Hydrocortisone:ti,ab,kw OR Tetrahydrocortisol:ti,ab,kw OR Tetrahydrocortisone:ti,ab,kw OR Desoxycorticosterone:ti,ab,kw OR Pregnenolone:ti,ab,kw OR Hydroxypregnenolone:ti,ab,kw

**#3** MeSH descriptor: [Glucocorticoids] explode all trees OR MeSH descriptor: [Beclomethasone] explode all trees OR MeSH descriptor: [Betamethasone] explode all trees OR MeSH descriptor: [Betamethasone Valerate] explode all trees OR MeSH descriptor: [Budesonide] explode all trees OR MeSH descriptor: [Clobetasol] explode all trees OR MeSH descriptor: [Desoximetasone] explode all trees OR MeSH descriptor: [Dexamethasone Isonicotinate] explode all trees OR MeSH descriptor: [Diflucortolone] explode all trees OR MeSH descriptor: [Flumethasone] explode all trees OR MeSH descriptor: [Fluocinolone Acetonide] explode all trees OR MeSH descriptor: [Fluocinonide] explode all trees OR MeSH descriptor: [Fluocortolone] explode all trees OR MeSH descriptor: [Fluorometholone] explode all trees OR MeSH descriptor: [Fluprednisolone] explode all trees OR MeSH descriptor: [Flurandrenolone] explode all trees OR MeSH descriptor: [Fluticasone Propionate, Salmeterol Xinafoate Drug Combination] explode all trees OR MeSH descriptor: [Melengestrol Acetate] explode all trees OR MeSH descriptor: [Methylprednisolone] explode all trees OR MeSH descriptor: [Methylprednisolone Hemisuccinate] explode all trees OR MeSH descriptor: [Paramethasone] explode all trees OR MeSH descriptor: [Prednisolone] explode all trees OR MeSH descriptor: [Prednisone] explode all trees OR MeSH descriptor: [Triamcinolone] explode all trees OR MeSH descriptor: [Triamcinolone Acetonide] explode all trees

**#4** Glucocorticoid*:ti,ab,kw OR alclometasone dipropionate:ti,ab,kw OR amcinonide:ti,ab,kw OR Beclomethasone:ti,ab,kw OR Betamethasone:ti,ab,kw OR Budesonide:ti,ab,kw OR ciclesonide:ti,ab,kw OR Clobetasol:ti,ab,kw OR clocortolone:ti,ab,kw OR Desoximetasone:ti,ab,kw OR Dexamethasone:ti,ab,kw OR diflorasone:ti,ab,kw OR Diflucortolone:ti,ab,kw OR difluprednate:ti,ab,kw OR Flumethasone:ti,ab,kw OR Fluocinonide:ti,ab,kw OR fluocortin butyl ester:ti,ab,kw OR Fluocortolone:ti,ab,kw OR Fluorometholone:ti,ab,kw OR fluperolone acetate:ti,ab,kw OR fluprednidene acetate:ti,ab,kw OR Fluprednisolone:ti,ab,kw OR Flurandrenolone:ti,ab,kw OR Fluticasone :ti,ab,kw OR medrysone:ti,ab,kw OR Melengestrol Acetate:ti,ab,kw OR Methylprednisolone:ti,ab,kw OR Paramethasone:ti,ab,kw OR prednicarbate:ti,ab,kw OR Prednisone:ti,ab,kw OR rimexolone:ti,ab,kw OR terofenamate:ti,ab,kw OR Triamcinolone:ti,ab,kw

**#5** MeSH descriptor: MeSH descriptor: [Mineralocorticoids] explode all trees OR MeSH descriptor: [Desoxycorticosterone] explode all trees OR MeSH descriptor: [Desoxycorticosterone Acetate] explode all trees

**#6** Mineralocorticoid*:ti,ab,kw OR Desoxycorticosterone:ti,ab,kw

**#7 #1 OR #2 OR #3 OR #4 OR #5 OR #6**

**#8** MeSH descriptor: [Bronchopulmonary Dysplasia] explode all trees OR MeSH descriptor: [Pulmonary Disease, Chronic Obstructive] explode all trees OR MeSH descriptor: [Bronchitis, Chronic] explode all trees OR MeSH descriptor: [Pulmonary Emphysema] explode all trees

**#9** bronchopulmonary dysplasia:ti,ab,kw OR chronic lung disease*:ti,ab,kw OR chronic pulmonary disease*:ti,ab,kw OR Pulmonary Emphysema:ti,ab,kw OR Chronic Bronchitis:ti,ab,kw

**#10 #8 OR #9**

**#11** MeSH descriptor: [Infant, Newborn] explode all trees OR MeSH descriptor: [Infant, Low Birth Weight] explode all trees OR MeSH descriptor: [Infant, Small for Gestational Age] explode all trees OR MeSH descriptor: [Infant, Very Low Birth Weight] explode all trees OR MeSH descriptor: [Infant, Postmature] explode all trees OR MeSH descriptor: [Infant, Premature] explode all trees OR MeSH descriptor: [Infant, Extremely Premature] explode all trees OR MeSH descriptor: [Infant, Extremely Low Birth Weight] explode all trees

**#12** newborn*:ti,ab,kw OR neonate*:ti,ab,kw OR neonatal:ti,ab,kw OR premature:ti,ab,kw OR Small for Gestational Age:ti,ab,kw OR low birth weight:ti,ab,kw OR very low birth weight:ti,ab,kw OR VLBW:ti,ab,kw OR LBW:ti,ab,kw

**#13 #11 OR #12**

**#14 #7 AND #10 AND #13**
