# Supplementary material
Source: HighWire-hosted journal article supplement (https://fn.bmj.com/content/103/6/F506)
Supplement: inline-supplementary-material-4 [file inline-supplementary-material-4.docx]

**Appendix 4 Study and population characteristics**

| **Study ID** | **Country** | **Interventions,n1**  **(route, total dosage/kg, duration)** | **Gestational age**  **(week)2** | **Birth weight(gram)2** | **Postnatal age at entry (day)2** | **Other medicines(n,%)** |
| --- | --- | --- | --- | --- | --- | --- |
| **Dexamethasone vs Placebo** | | | | | | |
| **Kothadia 1999,**1**O'shea 1999,**2  **O'shea 2007**3 | USA | Dexamethasone,57(iv,7.659mg/kg,42 days) | 26(23-29)3 | 740(456-1352) 3 | 19(15-27) 3 | Prenatal corticosteroids (20, 35)  Surfactant (56, 99) |
| Placebo,61 | 25(23-31) 3 | 760(515-1324) 3 | 20(15-30) 3 | Prenatal corticosteroids (13, 21)  Surfactant (61, 100) |
| **Yeh 1997,**4  **Yeh 1998,**5  **Yeh 2004,**6  **Lin 2005**7 | Taiwan | Dexamethasone,132(iv, 6.16 mg/kg,28 days) | 29.5,2.7 | 1286,345 | NR4 | Prenatal corticosteroids(39, 29.5) |
| Placebo,130 | 29.2,2.6 | 1312,361 | NR | Prenatal corticosteroids(44, 33.8) |
| **Lin 1999**8 | Taiwan | Dexamethasone,20(iv,6.16 mg/kg,28 days) | 28.3, 3.0 | 1046, 294 | 7.8, 4.0 | Surfactant (20,100) |
| Placebo,20 | 28.4, 2.7 | 1087, 209 | 8.0, 4.6 | Surfactant (20,100) |
| **Wang 1996**9 | Taiwan | Dexamethasone,34(iv, 5.95mg/kg,21 days) | 28, 2.7 | 1392, 237 | NR | NR |
| Placebo,29 | 29, 2.9 | 1378, 344 | NR | NR |
| **Romagnoli 1999,** 10  **Romagnoli 2002 a**11 | Italy | Dexamethasone,15(iv, 4.75 mg/kg, 14 days) | 27.5, 1.4 | 850, 183 | NR | Prenatal corticosteroids (6, 40) |
| Placebo,15 | 27.1, 1.4 | 948, 239 | NR | Prenatal corticosteroids (7, 46.6) |
| Dexamethasone,15(iv, 2.38 mg/kg, 7 days) | 27.7, 2.0 | 926, 230 | NR | Prenatal corticosteroids (9, 60) |
| Placebo,15 | 27.6, 1.5 | 931, 209 | NR | Prenatal corticosteroids(10, 66.6) |
| **Kari 1993,** 12  **Mieskonen 2003**13 | Finland | Dexamethasone,17(iv,3.5mg/kg,7 days) | 27, 2 | 880, 194 | 14, 3 | Prenatal corticosteroids (1, 5.9)  Surfactant (3, 17.6) |
| Placebo,21 | 27, 2 | 880, 194 | 13, 3 | Prenatal corticosteroids (1, 4.8)  Surfactant (1, 4.8) |
| **Rastogi 1996**14 | USA | Dexamethasone,36(iv,3.3mg/kg,12 days) | 28.8, 2 | 1097, 234 | 7.2, 2.7 | Prenatal corticosteroids (2, 5.6)  Surfactant (36, 100) |
| Placebo,34 | 28.2, 2 | 1022, 226 | 7.2, 3 | Prenatal corticosteroids (4, 11.8)  Surfactant (34, 100) |
| **Morales 1998**15 | USA | Dexamethasone,13(iv,3.3mg/kg,12 days) | 26.8, 0.8 | 840, 78 | NR | Surfactant (13, 100) |
| Placebo,17 | 26.8, 1.3 | 838, 93 | NR | Surfactant (17, 100) |
| **Tapia 1998**16 | Chile | Dexamethasone,55(iv, 2.79 mg/kg,12 days) | 29. 1,2 | 1176, 244 | NR | Prenatal corticosteroids (18, 33)  Surfactant (55,100) |
| Placebo,54 | 28.7, 1.8 | 1074, 230 | NR | Prenatal corticosteroids (18, 33)  Surfactant (54,100) |
| **Soll 2001**17 | USA | Dexamethasone,273(iv,2.7mg/kg,12 days) | 25.8, 0.1 | 750.5, 7.7 | NR | Prenatal corticosteroids (197, 72)  Surfactant (273, 100) |
| Placebo,269 | 25.7, 0.1 | 742.4, 8.5 | NR | Prenatal corticosteroids (205, 76)  Surfactant (269, 100) |
| **Suske 1996**18 | Germany | Dexamethasone,14(iv, 2.5mg/kg,5 days) | 30.6, 2.7 | 1446, 422 | NR | Prenatal corticosteroids (6, 43)  Surfactant (14,100) |
| Placebo,12 | 29.3, 2.2 | 1219, 292 | NR | Prenatal corticosteroids (5, 42)  Surfactant (12,100) |
| **Romagnoli 1999,** 19  **Romagnoli 2002 b**20 | Italy | Dexamethasone,25(iv,2.375mg/kg,7 days) | 28(25-31)5 | 940(590-1250) 5 | NR | Prenatal corticosteroids (13, 52)  Surfactant (Yes) |
| Placebo,25 | 28(25-30)5 | 940(610-1250) 5 | NR | Prenatal corticosteroids (11, 44)  Surfactant (Yes) |
| **Zecca 2001**21 | Italy | Dexamethasone,25(iv, 2.375 mg/kg,7 days) | 27.5,2 | 899, 250 | NR | Prenatal corticosteroids (9,45)  Surfactant (Yes) |
| Placebo,25 | 27.9, 1.5 | 965, 235 | NR | Prenatal corticosteroids (8, 40)  Surfactant (Yes) |
| **Durand 1995**22 | USA | Dexamethasone,23(iv,2.35mg/kg,7 days) | 27.4, 1.6 | 887, 213 | 9.7, 2.6 | Surfactant (19, 83) |
| Placebo,20 | 27.4, 1.7 | 834, 201 | 8.9, 1.8 | Surfactant (18, 90) |
| **Walther 2003**23 | USA | Dexamethasone,17(iv, 1.9mg/kg,14 days) | 28.5, 1.7 | 993, 203 | NR | Prenatal corticosteroids (13,76)  Surfactant (17,100) |
| Placebo,19 | 28.6, 1.9 | 1029, 225 | NR | Prenatal corticosteroids (8,42)  Surfactant (19,100) |
| **Brozanski 1995,**24  **Gilmour 2005**25 | USA | Dexamethasone,39(iv,≥1.5mg/kg,≥3 days) | 25.6, 1.87 | 794, 168.61 | 7 | Prenatal corticosteroids (8, 20.5)  Surfactant (35, 89.7) |
| Placebo,39 | 26, 1.87 | 814, 149.88 | 7 | Prenatal corticosteroids (9, 23.1)  Surfactant (34, 87.2) |
| **Shinwell 1996,**26  **Shinwell 2000**27 | Israel | Dexamethasone,132(iv,1.5mg/kg,3 days) | 29, 2.30 | 1185, 402.12 | NR | Prenatal corticosteroids (35, 26.5)  Surfactant (132, 100) |
| Placebo,116 | 29, 2.15 | 1174, 366.19 | NR | Prenatal corticosteroids (30, 25.9)  Surfactant (116, 100) |
| **Garland 1999**28 | USA | Dexamethasone,118  (iv,1.175mg/kgor 1.35mg/kg,3 days) | 26, 0.2 | 835, 19 | NR | Prenatal corticosteroids (22,18.6)  Surfactant (118,100) |
| Placebo,123 | 26.1, 0.2 | 825, 19 | NR | Prenatal corticosteroids (24,19.5)  Surfactant (123,100) |
| **Anttila 2005**29 | Finland | Dexamethasone,53(iv, 1 mg/kg,2 days) | 26.3, 1.4 | 781, 124 | NR | Prenatal corticosteroids (45, 87)  Surfactant (48, 91) |
| Placebo,56 | 27.0, 1.5 | 772, 140 | NR | Prenatal corticosteroids (46, 82)  Surfactant (50, 91) |
| **Sinkin 2000**30 | USA | Dexamethasone,189(iv,1mg/kg,1 day) | 26.3, 1.37 | 890, 261.21 | NR | Prenatalcorticosteroids  (116, 61.4)  Surfactant (189, 100) |
| Placebo,195 | 26.1, 1.40 | 864, 237.39 | NR | Prenatalcorticosteroids(104, 53.3)  Surfactant (195, 100) |
| **Doyle 2006,** 31  **Doyle 2007**32 | Australia, Canada, New Zealand | Dexamethasone,35(iv,0.89mg/kg,10 days) | 24 (24-25)6 | 652 (590-730) 6 | 23 (20-34) 6 | Prenatal corticosteroids(31, 88.6)  Surfactant (33, 94.3) |
| Placebo,35 | 25 (24-26) 6 | 700 (612-790) 6 | 22 (13-28) 6 | Prenatal corticosteroids(31, 88.6)  Surfactant (34, 97.1) |
| **Stark 2001,** 33  **Stark 2014**34 | USA | Dexamethasone,111(iv,0.89mg/kg,10 days) | 25.3, 1.7 | 734, 131 | 0.29, 0.12 | Prenatal corticosteroids (82, 74)  Surfactant (106, 95) |
| Placebo,109 | 25.4, 1.6 | 736, 135 | 0.28, 0.12 | Prenatal corticosteroids (82, 75)  Surfactant (105, 96) |
| **Lauterbach 2006**35 | Poland | Dexamethasone,33(iv, 0.75mg/kg, 3 days) | 28.5, 2.0 | 1072, 199 | NR | Prenatal corticosteroids (22,67)  Surfactant (Yes) |
| Placebo,27 | 28.8, 2.05 | 1137, 222 | NR | Prenatal corticosteroids (20,74)  Surfactant (Yes) |
| **Sanders 1994**36 | USA | Dexamethasone,19(iv, 0.2mg/kg,1 day) | 26.2, 0.44 | 831, 54.6 | NR | Prenatal corticosteroids (6, 32)  Surfactant (14,74) |
| Placebo,21 | 26.9, 0.46 | 839, 49.1 | NR | Prenatal corticosteroids (9, 43)  Surfactant (16, 76) |
| **Kopelman 1999**37 | USA | Dexamethasone,37(iv, 0.2mg/kg,1dose) | 25.6, 0.2 | 773, 39 | NR | Surfactant (28, 85) |
| Placebo,33 | 25.8, 0.2 | 736, 24 | NR | Surfactant (29, 78) |
| **Hydrocortisone vs Placebo** | | | | | | |
| **Baden 1972**38 | Canada | Hydrocortisone,22(iv,30mg/kg,1 day) | 32.5, 0.6 | 1730, 134 | 0.14, 0.025 | NR |
| Placebo,22 | 31.8, 0.6 | 1767, 121 | 0.18, 0.03 | NR |
| **Parikh 2013,**39  **Parikh 2015**40 | USA | Hydrocortisone,31(iv,17mg/kg,7 days) | 25 (24-26)5 | 677,107 | 17 (14 -19) 5 | Surfactant (31, 100) |
| Placebo,33 | 25 (24-27) 5 | 655,142 | 16 (13 -20) 5 | Surfactant (32, 97) |
| **Watterberg 2004,** 41  **Watterberg 2007**42 | USA | Hydrocortisone,180(iv, 13.5 mg/kg,15 days) | 25.2, 1.5 | 731, 126 | NR | Prenatal corticosteroids (138, 77)  Surfactant (152, 84) |
| Placebo,180 | 25.3, 1.7 | 734, 126 | NR | Prenatal corticosteroids (146, 81)  Surfactant (158, 88) |
| **Peltoniemi 2005,** 43  **Peltoniemi 2009,** 44  **Peltoniemi 2016**45 | Finland | Hydrocortisone,25(iv,11.5mg/kg,10 days) | 26.7,1.6 | 888,204 | NR | Prenatal corticosteroids (23,92)  Surfactant (24,96) |
| Placebo,26 | 26.5,2.8 | 903,220 | NR | Prenatal corticosteroids (25,96)  Surfactant (23,89) |
| **Bonsante 2007**46 | Italy | Hydrocortisone,25(iv, 10.5mg/kg,12days) | 26.2(25.2-27.4) 5 | 840(700-1000) 5 | NR | Prenatal corticosteroids(13,52) |
| Placebo,25 | 26.5( 25.0-28.1) 5 | 900(730-1010) 5 | NR | Prenatal corticosteroids(17,68) |
| **Watterberg 1999**47 | USA | Hydrocortisone,20(iv,10.5mg/kg,12 days) | 25.2, 1.3 | 732, 135 | NR | Prenatal corticosteroids (17, 85) |
| Placebo,20 | 25.4, 1.5 | 770, 135 | NR | Prenatal corticosteroids (17, 85) |
| **Baud 2016**48 | France | Hydrocortisone,255(iv,7.5mg/kg,10 days) | Median 26.4 | Median 860 | Median 0.67 | Prenatal corticosteroids (238, 93) |
| Placebo,266 | Median 26.5 | Median 840 | Median 0.64 | Prenatal corticosteroids 246, 92) |
| **Budesonide vs Placebo** | | | | | | |
| **Bassler 2015**49 | 9 countries | Budesonide,437(inh,19.16±11.96mg,33.9±15.9 days) | 26.1, 1.3 | 798, 193 | Median 0.28 | Prenatal corticosteroids  (388, 88.8) |
| Placebo,419 | 26.1, 1.2 | 803, 189 | Median 0.28 | Prenatal corticosteroids  (383, 91.4) |
| **Merz 1999**50 | Germany | Budesonide,12(inh,>16mg,10 days or until the infants were extubated) | 28.0 (27-32) 5 | 1108(820-1420) 5 | NR | Prenatal corticosteroids (7, 58)  Surfactant (10, 83) |
| Placebo,11 | 29.0 (27-31) 5 | 1120(880-1480) 5 | NR | Prenatal corticosteroids (7, 64)  Surfactant (9, 82) |
| **Jonsson 2000**51 | Sweden | Budesonide,15(inh,>2.25mg/kg,42 days) | 25 (23-27) 5 | 766(525-1122) 5 | NR | Prenatal corticosteroids (12, 80)  Surfactant (14, 93) |
| Placebo,15 | 26 (24-29) 5 | 813(630-1227) 5 | NR | Prenatal corticosteroids (10, 67)  Surfactant (15, 100) |
| **Beclomethasone vs Placebo** | | | | | | |
| **Denjean 1998**52 | France | Beclomethasone,44(iv,28mg,28 days) | 27.6, 1.5 | 1060, 248 | NR | Prenatal corticosteroids  (11, 25.6)  Surfactant (34, 79.1) |
| Placebo,43 | 27.8, 1.6 | 1082, 260 | NR | Prenatal corticosteroids  (11, 25.6)  Surfactant (34, 79.1) |
| **Jangaard 2002**53 | Canada | Beclomethasone,30(inh,4.8 mg/kg,24 days) | 27.2, 2 | 882, 204 | NR | Prenatal corticosteroids (15, 50)  Surfactant (19, 63) |
| Placebo,30 | 27.9, 2 | 917, 178 | NR | Prenatal corticosteroids (16, 53)  Surfactant (25, 83) |
| **Zimmerman 2000**54 | USA | Beclomethasone,23(inh,2.52 mg,24 days) | 26, 2 | 910, 198 | NR | Prenatal corticosteroids (14, 70)  Surfactant (15, 75.0) |
| Placebo,24 | 26, 2 | 802, 225 | NR | Prenatal corticosteroids(15, 78.9)  Surfactant (18, 94.7) |
| **Cole 1999**55 | England | Beclomethasone,123(inh,0.63mg/kg,28days) | 26,2 | 800,193 | 5.7,3.4 | Prenatal corticosteroids  (77,62.6)  Surfactant(95,77.23) |
| Placebo,130 | 26,2 | 802,189 | 5.4,2.9 | Prenatal corticosteroids  (68,52.3)  Surfactant(97,74.6) |
| **Fluticasone vs Placebo** | | | | | | |
| **Fok 1999**56 | NR | Fluticasone,27(inh,7mg,14 days) | 27.9, 0.5 | 993, 71 | NR | Prenatal corticosteroids(15, 55.6)  Surfactant (27, 100) |
| Placebo,26 | 27.1, 0.5 | 981, 71 | NR | Prenatal corticosteroids (13, 50)  Surfactant (26, 100) |
| **Dexamethasone vs Beclomethasone** | | | | | | |
| **Rozycki 2003**57 | USA | Dexamethasone+Placebo,15(iv,7.659mg/kg,42 days) | 26 (24-27) 5 | 773, 511.23 | NR | Prenatal corticosteroids (2, 13.3)  Surfactant (15, 100) |
| Beclomethasone+Placebo,16(inh,0.0168-0.02583mg/kg,42 days) | 26 (23-29) 5 | 710, 592 | NR | Prenatal corticosteroids (1, 6.3)  Surfactant (16, 100) |
| Beclomethasone+Placebo,15(inh,0.007-0.01295mg/kg,42 days) | 26 (24-30) 5 | 796, 588.69 | NR | Prenatal corticosteroids (3, 20)  Surfactant (15, 100) |
| Beclomethasone+Placebo,15(inh,0.00336-0.00518mg/kg,42 days) | 25 (24-31) 5 | 760, 480.25 | NR | Prenatal corticosteroids (2, 13.3)  Surfactant (15, 100) |
| **Dexamethasone vs Budesonide** | | | | | | |
| **Dimitriou 1997**58 | UK | Dexamethasone,20(iv/po,2.8mg/kg,10 days) | 27 (24-31) 5 | 818(425-1460) 5 | 27 (8-118) 5 | Prenatal corticosteroids (11, 55)  Surfactant (12, 60) |
| Budesonide,20(inh,1mg,10 days) | 27 (24-30) 5 | 849(584-1270) 5 | 26 (5-97) 5 | Prenatal corticosteroids (12, 60)  Surfactant (14, 70) |
| **Halliday 2001,**59  **Wilson 2006**60 | Northern Ireland | Early Dexamethasone,135(iv/po,2.7mg/kg,12 days) | 27.4, 1.9 | 1017, 290 | NR | Prenatal corticosteroids (82, 61)  Surfactant (128, 95) |
| Late Dexamethasone,150(iv/po,2.7mg/kg,12 days) | 27.1, 1.9 | 1007, 283 | NR | Prenatal corticosteroids (82, 55)  Surfactant (138, 92) |
| Early Budesonide,143(inh,0.96mg/kg,12 days) | 27.3, 1.8 | 1010, 284 | NR | Prenatal corticosteroids (88, 62)  Surfactant (133, 93) |
| Late Budesonide,142(inh,0.96mg/kg,12 days) | 27.0, 2.0 | 994, 279 | NR | Prenatal corticosteroids (89, 63)  Surfactant (132, 93) |
| **Dexamethasone vs Dexamethasone** | | | | | | |
| **Cummings 1989,**61  **Gross 2005**62 | USA | Dexamethasone,13(iv,7.659mg/kg,42 days) | 26, 2 | 818, 145 | 15, 2 | NR |
| Dexamethasone,12(iv,2.997mg/kg,18 days) | 26, 2 | 810, 208 | 15, 2 | NR |
| Placebo,11 | 26, 2 | 854, 197 | 15, 2 | NR |
| **Odd 2004**63 | New Zealand | Dexamethasone,17(iv, 7.659mg/kg, 42days) | 24 (23–27) 5 | 669, 113 | NR | NR |
| Dexamethasone,16(iv, >2.7 mg/kg, >9 days) | 24 (23–26) 5 | 720, 130 | NR | NR |
| **Bloomfield 1998,**64  **Armstrong 2002**65 | UK | Dexamethasone,19(iv, ≥7.659 mg/kg,3days) | 25.5 (23-30) 5 | 775(605-1170) 5 | NR | Prenatal corticosteroids (13,68) |
| Dexamethasone,21(iv, >1.5 mg/kg,42 days) | 25.5 (23-30) 5 | 790(560-1060) 5 | NR | Prenatal corticosteroids (13,62) |
| **Papile 1998**66 | USA | Dexamethasone,182(iv/po,4.0mg/kg,14days) | 25.7, 1.9 | 808, 187 | NR | Prenatal corticosteroids (53, 29)  Surfactant (165, 91) |
| Dexamethasone,189(iv/po,4.0mg/kg,14days) | 25.6, 1.6 | 801, 182 | NR | Prenatal corticosteroids (51, 27)  Surfactant (169, 89) |

Note:

1.Number at random for trials with short-term outcomes or number at long-term follow up for trials with only long-term outcomes.

2.Mean,SD.

3.Median,(5-95th percentiles)

4.NR: not report

5.Median (range)

6.Median (IQR)

References:

1 Kothadia J M, O'Shea T M, Dia Roberts, et al. Randomized placebo-controlled trial of a 42-day tapering course of dexamethasone to reduce the duration of ventilator dependency in very low birth weight infants. Pediatrics 1999:15-21.

2 O'Shea T M, Kothadia J M, Klinepeter K L, et al.Randomized placebo-controlled trial of a 42-day tapering course of dexamethasone to reduce the duration of ventilator dependency in very low birth weight infants: outcome of study participants at 1-year adjusted age. Pediatrics 1999:15-21.

3 O'Shea T M, Washburn L K, Nixon P A, et al. Follow-up of a randomized, placebo-controlled trial of dexamethasone to decrease the duration of ventilator dependency in very low birth weight infants: neurodevelopmental outcomes at 4 to 11 years of age. Pediatrics 2007, 120(3):594-602.

4 Yeh T F, Lin Y J, Hsieh W S, et al. Early postnatal dexamethasone therapy for the prevention of chronic lung disease in preterm infants with respiratory distress syndrome: a multicenter clinical trial. Pediatrics 1997, 100(4):E3.

5 Yeh T F, Lin Y J, Huang C C, et al. Early dexamethasone therapy in preterm infants: a follow-up study. Pediatrics 1998, 101(5):E7-E7.

6 Yeh T F, Lin Y J, Lin H C, et al. Outcomes at school age after postnatal dexamethasone therapy for lung disease of prematurity. New England Journal of Medicine 2004, 350(13):1304-13.

7 Lin Y J, Lin C H, Wu J M, et al. The effects of early postnatal dexamethasone therapy on pulmonary outcome in premature infants with respiratory distress syndrome: A two‐year follow‐up study. Acta Paediatrica 2005, 94(3):310-316.

8 Lin Y J, Yeh T F, Hsieh W S, et al. Prevention of chronic lung disease in preterm infants by early postnatal dexamethasone therapy. Pediatric Pulmonology 1999, 27(1):21–26.

9 Wang J Y, Yeh T F, Lin Y C, et al. Measurement of pulmonary status and surfactant protein levels during dexamethasone treatment of neonatal respiratory distress syndrome. Thorax 1996, 51(9):907-13.

10 Romagnoli C, Zecca E, Vento G, et al. Effect on growth of two different dexamethasone courses for preterm infants at risk of chronic lung disease. A randomized trial. Pharmacology 1999, 59(5):266-274.

11 Romagnoli C, Zecca E, Luciano R, et al. A three year follow up of preterm infants after moderately early treatment with dexamethasone. Archives of Disease in Childhood - Fetal and Neonatal Edition 2002, 87(1):55-8.

12 Kari M A, Heinonen K, Ikonen R S, et al. Dexamethasone treatment in preterm infants at risk for bronchopulmonary dysplasia. Archives of Disease in Childhood 1993, 68(5SpecNo):566-9.

13 Mieskonen S, Eronen M, Malmberg L P, et al. Controlled trial of dexamethasone in neonatal chronic lung disease: an 8-year follow-up of cardiopulmonary function and growth. Acta Paediatrica 2003, 92(8):896-904.

14 Alok Rastogi, Subuola M Akintorin, Michelle L Bea, et al. A controlled trial of dexamethasone to prevent bronchopulmonary dysplasia in surfactant-treated infants.Pediatrics1996

15 Morales P, Rastogi A, Bez M L, et al. Effect of Dexamethasone Therapy on the Neonatal Ductus Arteriosus. Pediatric Cardiology 1998, 19(3):225-9.

16 Tapia J L, Ramírez R, Cifuentes J, et al. The effect of early dexamethasone administration on bronchopulmonary dysplasia in preterm infants with respiratory distress syndrome. Journal of Pediatrics 1998, 132(1):48-52.

17 Group V O N S S. Early postnatal dexamethasone therapy for the prevention of chronic lung disease. Pediatric Research 2001, 108(3):741-8.

18 Suske G, Oestreich K, Varnholt V, et al. Influence of early postnatal dexamethasone therapy on ventilator dependency in surfactant-substituted preterm infants. Acta Paediatrica 1996, 85(6):713–718.

19 Romagnoli C, Zecca E, Vento G, et al. Early postnatal dexamethasone for the prevention of chronic lung disease in high-risk preterm infants. Intensive Care Medicine 1999, 25(7):717-21.

20 Romagnoli C, Zecca E, Luciano R, et al. Controlled trial of early dexamethasone treatment for the prevention of chronic lung disease in preterm infants: a 3-year follow-up. Pediatrics 2002, 109(6):10204-10205.

21 Zecca E, Papacci P, Maggio L, et al. Cardiac adverse effects of early dexamethasone treatment in preterm infants: a randomized clinical trial. Journal of Clinical Pharmacology 2001, 41(10):1075-81.

22 Durand M, Sardesai S, Mcevoy C. Effects of early dexamethasone therapy on pulmonary mechanics and chronic lung disease in very low birth weight infants: a randomized, controlled trial. Pediatrics 1995, 95(95):584-90.

23 Walther F J, Findlay R D, Durand M. Adrenal suppression and extubation rate after moderately early low-dose dexamethasone therapy in very preterm infants. Early Human Development 2003, 74(1):37-45.

24 Brozanski B S, Jones J G, Gilmour C H, et al. Effect of pulse dexamethasone therapy on the incidence and severity of chronic lung disease in the very low birth weight infant. Journal of Pediatrics 1995, 126(1):769-76.

25 Gilmour C H, Sentipal-Walerius J M, Jones J G, et al. Pulse dexamethasone does not impair growth and body composition of very low birth weight infants. Journal of the American College of Nutrition 1995, 14(5):455-62.

26 Shinwell E S, Karplus M, Zmora E, et al. Failure of early postnatal dexamethasone to prevent chronic lung disease in infants with respiratory distress syndrome. Archives of Disease in Childhood Fetal & Neonatal Edition 1996, 74(1):33-7.

27 Shinwell E, Karplus M, Reich D, et al. Early postnatal dexamethasone treatment and increased incidence of cerebral palsy. Archives of Disease in Childhood - Fetal and Neonatal Edition 2000, 83(3):177-81.

28 Garland J S, Alex C P, Pauly T H, et al. A three-day course of dexamethasone therapy to prevent chronic lung disease in ventilated neonates: a randomized trial. Pediatrics 1999, 104(1 Pt 1):91-9.

29 Anttila E, Peltoniemi O, Haumont D, et al. Early neonatal dexamethasone treatment for prevention of bronchopulmonary dysplasia. Randomised trial and meta-analysis evaluating the duration of dexamethasone therapy. European Journal of Pediatrics 2005, 164(8):472-81.

30 Sinkin R A, Dweck H S, Horgan M J, et al. Early dexamethasone-attempting to prevent chronic lung disease. Pediatrics 2000, 105(1):542-8.

31 Doyle L W, Davis P G, Morley C J, et al. Low-dose dexamethasone facilitates extubation among chronically ventilator-dependent infants: a multicenter, international, randomized, controlled trial.Pediatrics 2006, 117(1):75-83.

32 Doyle L W, Davis P G, Morley C J, et al. Outcome at 2 Years of Age of Infants From the DART Study: A Multicenter, International, Randomized, Controlled Trial of Low-Dose Dexamethasonef. Pediatrics 2007, 119(4):716-21.

33 Stark A R, Carlo W A, Tyson J E, et al. Adverse effects of early dexamethasone treatment in extremely-low-birth-weight infants. New England Journal of Medicine 2001, 344(2): 95-101.

34 Stark A R, Carlo W A, Vohr B R, et al. Death or neurodevelopmental impairment at 18 to 22 months corrected age in a randomized trial of early dexamethasone to prevent death or chronic lung disease in extremely low birth weight infants. Journal of Pediatrics 2014, 164(1):34-39(e2).

35 Lauterbach R, Szymura-Oleksiak J, Pawlik D, et al. Nebulized pentoxifylline for prevention of bronchopulmonary dysplasia in very low birth weight infants: A pilot clinical study. Journal of Maternal-Fetal and Neonatal Medicine 2006, 19(7):433-8.

36 Sanders R J, Cox C, Phelps D L, et al. Two doses of early intravenous dexamethasone for the prevention of bronchopulmonary dysplasia in babies with respiratory distress syndrome. Pediatric Research 1994, 36(1 Pt 1):122-8.

37 Kopelman A E, Moise A A, Holbert D, et al. A single very early dexamethasone dose improves respiratory and cardiovascular adaptation in preterm infants. Journal of Pediatrics 1999, 135(135):345-50.

38 Baden M, Bauer C R, Colle E, et al. A controlled trial of hydrocortisone therapy in infants with respiratory distress syndrome. Pediatrics 1972, 50(4):526-34.

39 Parikh N A, Kennedy K A, Lasky R E, et al. Pilot Randomized Trial of Hydrocortisone in Ventilator-Dependent Extremely Preterm Infants: Effects on Regional Brain Volumes. Journal of Pediatrics 2013, 162(4):685-690.

40 Parikh N A, Kennedy K A, Lasky R E, et al. Neurodevelopmental Outcomes of Extremely Preterm Infants Randomized to Stress Dose Hydrocortisone. Plos One 2015, 10(9).

41 Watterberg K L, Gerdes J S, Cole C H, et al. Prophylaxis of Early Adrenal Insufficiency to Prevent Bronchopulmonary Dysplasia: A Multicenter Trial. Pediatrics 2004, 114(6):1649-57.

42[Watterberg KL, Shaffer ML, Mishefske MJ, et al. Growth and neurodevelopmental outcomes after early low-dose hydrocortisone treatment in extremely low birth weight infants. Pediatrics 2007; 120:40.](https://www.uptodate.com/contents/postnatal-use-of-glucocorticoids-in-bronchopulmonary-dysplasia/abstract/29)

43 Peltoniemi O, Kari M A, Heinonen K, et al. Pretreatment cortisol values may predict responses to hydrocortisone administration for the prevention of bronchopulmonary dysplasia in high-risk infants. Journal of Pediatrics 2005, 146(5):632-7.

44 Peltoniemi O M, Lano A, Puosi R, et al. Trial of Early Neonatal Hydrocortisone: Two-Year Follow-Up. Neonatology 2009, 95(3):240-247.

45 Peltoniemi O M, Lano A, Yliherva A, et al. Randomised trial of early neonatal hydrocortisone demonstrates potential undesired effects on neurodevelopment at preschool age. Acta Paediatrica 2016, 105(2):85-87.

46 Bonsante F, Latorre G, Iacobelli S, et al. Early low-dose hydrocortisone in very preterm infants: a randomized, placebo-controlled trial. Neonatology 2007, 91(4):217-21.

47 Watterberg K L, Gerdes J S, Gifford K L, et al. Prophylaxis against early adrenal insufficiency to prevent chronic lung disease in premature infants. Pediatrics 1999, 104(6):232A–232A.

48 Baud O, Maury L, Lebail F, et al. Effect of early low-dose hydrocortisone on survival without bronchopulmonary dysplasia in extremely preterm infants (PREMILOC): a double-blind, placebo-controlled, multicentre, randomised trial. Lancet 2016, 387(10030):1827-1836.

49 Bassler D, Plavka R, Shinwell E S, et al. Early Inhaled Budesonide for the Prevention of Bronchopulmonary Dysplasia. New England Journal of Medicine 2015, 373(16):1497-1506.

50 Merz U, Kusenbach G, Häusler M, et al. Inhaled budesonide in ventilator-dependent preterm infants: a randomized, double-blind pilot study. Biology of the Neonate 1999, 75(1):46-53.

51 Jónsson B, Eriksson M, Söder O, et al. Budesonide delivered by dosimetric jet nebulization to preterm very low birthweight infants at high risk for development of chronic lung disease. Acta Paediatrica 2000, 89(12):1449-55.

52 Denjean A, Parisllado J, Zupan V, et al. Inhaled salbutamol and beclomethasone for preventing broncho-pulmonary dysplasia: a randomised double-blind study. European Journal of Pediatrics 1998, 157(11):926-931.

53 Jangaard K A, Stinson D A, Allen A C, et al. Early prophylactic inhaled beclomethasone in infants less than 1250 g for the prevention of chronic lung disease. Paediatrics & Child Health 2002, 7(1):13-9.

54 Zimmerman J J, Gabbert D, Shivpuri C, et al. Meter-dosed, inhaled beclomethasone initiated at birth to prevent bronchopulmonary dysplasia. Pediatric Critical Care Medicine 2000, 1(2): 140-145.

55 Cole C H, Colton T, Shah B L, et al. Early inhaled glucocorticoid therapy to prevent bronchopulmonary dysplasia. New England Journal of Medicine 1999, 340(13):1005-10.

56 Fok T F, Lam K, Dolovich M, et al. Randomised controlled study of early use of inhaled corticosteroid in preterm infants with respiratory distress syndrome. Archives of Disease in Childhood - Fetal and Neonatal Edition 1999, 80(3):203-8.

57 Rozycki H J, Byron P R, Elliott G R, et al. Randomized controlled trial of three different doses of aerosol beclomethasone versus systemic dexamethasone to promote extubation in ventilated premature infants. Pediatric Pulmonology 2003, 35(5):375–383.

58 Dimitriou G, Greenough A, Giffin F J, et al. Inhaled versus systemic steroids in chronic oxygen dependency of preterm infants. European Journal of Pediatrics 1996, 156(1):51-5.

59 Halliday H L, Patterson C C, Halahakoon C W N L. A multicenter, randomized open study of early corticosteroid treatment (OSECT) in preterm infants with respiratory illness: comparison of early and late treatment and of dexamethasone and inhaled budesonide. Pediatrics 2001, 107(2): 232-240.

60 Wilson T T, Waters L, Patterson C C, et al. Neurodevelopmental and respiratory follow-up results at 7 years for children from the United Kingdom and Ireland enrolled in a randomized trial of early and late postnatal corticosteroid treatment, systemic and inhaled the Open Study of Early Corticostero. Pediatrics 2006, 117(6):2196-205.

61 Cummings J J, D'Eugenio D B, Gross S J. A controlled trial of dexamethasone in preterm infants at high risk for bronchopulmonary dysplasia. New England Journal of Medicine 1989, 320(23):1505-10.

62 Gross S J, Anbar R D, Mettelman B B. Follow-up at 15 years of preterm infants from a controlled trial of moderately early dexamethasone for the prevention of chronic lung disease. Pediatrics 2005, 115(3):681-7.

63 Odd D E, Armstrong D L, Teele R L, et al. A randomized trial of two dexamethasone regimens to reduce side-effects in infants treated for chronic lung disease of prematurity. Journal of Paediatrics and Child Health 2004, 40(5-6):282-9.

64 Bloomfield F H, Knight D B, Harding J E. Side effects of 2 different dexamethasone courses for preterm infants at risk of chronic lung disease: A randomized trial. Journal of Pediatrics 1998, 133(3):395-400.

65 D Armstrong, J Penrice, F Bloomfield, D Knight, J Dezoete, J Harding. Follow up of a randomised trial of two different courses of dexamethasone for preterm babies at [risk](file:///C:\Users\wo158\OneDrive\TJH-BPD\Reference要求.docx) of chronic lung disease. Archives of Disease in Childhood - Fetal and Neonatal Edition 2002, 86(2):F102-7.

66 Papile L A, Tyson J E, Stoll B J, et al. A multicenter trial of two dexamethasone regimens in ventilator-dependent premature infants. New England Journal of Medicine 1998, 338(16):1112-8.
